# Supplementary material
Source: PubMed Central journal article supplement (PMC7364847)
Supplement: ntz122_suppl_supplementary_table_1.pdf [file ntz122_suppl_supplementary_table_1.pdf]

**Supplemental Table 1:** Weighted, adjusted geometric mean concentrations of biomarkers of exposure to tobacco & cannabis-related toxicants (n=5,859)

| Chemical Class                          | Urinary Biomarker (Parent Compound) (Unit)                                    | P30D Cannabis Use | Non-tobacco users (n=1,736) |              |              | E-cigarette-only users (n=181) |               |               | Cigarette-only smokers (n=2,412) |               |                | All exclusive cigar users (n=336) |               |               | Hookah-only smokers (n=402) |               |               | Dual users of tobacco cigarettes and e-cigarettes (n=792) |                |                |
|-----------------------------------------|-------------------------------------------------------------------------------|-------------------|-----------------------------|--------------|--------------|--------------------------------|---------------|---------------|----------------------------------|---------------|----------------|-----------------------------------|---------------|---------------|-----------------------------|---------------|---------------|-----------------------------------------------------------|----------------|----------------|
|                                         |                                                                               |                   | Geo Mean                    | 95% CI Lower | 95% CI Upper | Geo Mean                       | 95% CI Lower  | 95% CI Upper  | Geo Mean                         | 95% CI Lower  | 95% CI Upper   | Geo Mean                          | 95% CI Lower  | 95% CI Upper  | Geo Mean                    | 95% CI Lower  | 95% CI Upper  | Geo Mean                                                  | 95% CI Lower   | 95% CI Upper   |
| Nicotine                                | Total Nicotine Equivalent-2 (TNE-2) (Nicotine) (nmol/mL)                      | No                | 0.007                       | 0.006        | 0.008        | 0.18                           | 0.10          | 0.30          | 22.98                            | 20.33         | 25.97          | 0.17                              | 0.08          | 0.28          | 0.045                       | 0.025         | 0.080         | 41.79                                                     | 38.45          | 45.41          |
|                                         |                                                                               | Yes               | 0.008                       | 0.003        | 0.023        | 0.56                           | 0.17          | 1.80          | 24.19                            | 20.77         | 28.16          | <b>0.47*</b>                      | <b>0.24</b>   | <b>0.93</b>   | 0.092                       | 0.036         | 0.236         | 34.24                                                     | 27.12          | 43.22          |
| Tobacco-specific nitrosamines (TSNAs)   | NNAL (NNK) (ng/mL)                                                            | No                | 0.005                       | 0.004        | 0.006        | 0.002                          | 0.001         | 0.004         | 0.171                            | 0.162         | 0.180          | 0.053                             | 0.039         | 0.070         | 0.009                       | 0.006         | 0.012         | 0.243                                                     | 0.228          | 0.257          |
|                                         |                                                                               | Yes               | 0.007                       | 0.005        | 0.010        | 0.004                          | 0.002         | 0.007         | 0.163                            | 0.149         | 0.177          | 0.046                             | 0.036         | 0.059         | 0.008                       | 0.005         | 0.013         | 0.232                                                     | 0.202          | 0.266          |
| Polycyclic aromatic hydrocarbons (PAHs) | 1-Naphthol (Naphthalene) (ug/mL)                                              | No                | 1.74                        | 1.371        | 2.200        | 1.25                           | 0.61          | 2.55          | 9.28                             | 8.75          | 9.84           | 3.20                              | 2.15          | 4.76          | 1.85                        | 1.47          | 2.31          | 11.62                                                     | 10.41          | 12.98          |
|                                         |                                                                               | Yes               | 3.03                        | 0.79         | 11.59        | <b>2.83*</b>                   | <b>1.19</b>   | <b>6.70</b>   | 10.49                            | 8.78          | 12.52          | 3.39                              | 2.34          | 4.91          | 2.12                        | 1.62          | 2.76          | <b>18.15*</b>                                             | <b>13.71</b>   | <b>24.03</b>   |
|                                         | 2-Naphthol (Naphthalene) (ug/mL)                                              | No                | 6.45                        | 5.29         | 7.87         | 5.12                           | 3.39          | 7.72          | 13.04                            | 12.51         | 13.58          | 6.52                              | 5.29          | 8.01          | 7.79                        | 6.73          | 9.01          | 13.38                                                     | 12.76          | 14.02          |
|                                         |                                                                               | Yes               | 5.01                        | 3.14         | 7.97         | 6.70                           | 4.29          | 10.48         | 13.25                            | 12.25         | 14.32          | 7.35                              | 6.02          | 8.95          | 7.58                        | 6.29          | 9.13          | 14.62                                                     | 13.08          | 16.34          |
|                                         | 3-Hydroxyfluorene (Fluorene) (ng/mL)                                          | No                | 87.63                       | 74.97        | 102.42       | 64.45                          | 46.19         | 89.91         | 506.21                           | 486.74        | 526.46         | 176.94                            | 139.63        | 224.22        | 126.26                      | 105.29        | 151.40        | 555.08                                                    | 529.43         | 581.98         |
|                                         |                                                                               | Yes               | 81.11                       | 54.57        | 120.54       | <b>129.24*</b>                 | <b>70.67</b>  | <b>236.34</b> | <b>577.83*</b>                   | <b>530.95</b> | <b>628.84</b>  | 230.05                            | 178.30        | 296.84        | <b>167.07*</b>              | <b>136.60</b> | <b>204.34</b> | <b>745.51*</b>                                            | <b>664.38</b>  | <b>836.54</b>  |
|                                         | 2-Hydroxyfluorene (Fluorene) (ng/mL)                                          | No                | 237.59                      | 207.12       | 272.54       | 164.59                         | 121.80        | 222.42        | 902.02                           | 870.76        | 934.40         | 371.66                            | 305.96        | 451.47        | 288.12                      | 245.35        | 338.33        | 1006.44                                                   | 964.07         | 1050.68        |
|                                         |                                                                               | Yes               | 214.81                      | 149.60       | 308.42       | <b>291.41*</b>                 | <b>184.63</b> | <b>459.92</b> | <b>1000.35*</b>                  | <b>918.22</b> | <b>1089.83</b> | 420.61                            | 341.25        | 518.42        | <b>352.84*</b>              | <b>299.53</b> | <b>415.63</b> | <b>1280.67*</b>                                           | <b>1143.40</b> | <b>1434.42</b> |
|                                         | 1-Hydroxyphenanthrene (Phenanthrene) (ng/mL)                                  | No                | 158.24                      | 140.07       | 178.77       | 98.89                          | 70.67         | 138.37        | 168.98                           | 160.66        | 177.73         | 138.19                            | 116.42        | 164.02        | 154.71                      | 135.03        | 177.26        | 178.03                                                    | 169.44         | 187.06         |
|                                         |                                                                               | Yes               | 121.32                      | 78.29        | 187.98       | 130.01                         | 80.39         | 210.24        | 182.71                           | 167.06        | 199.82         | 131.46                            | 109.07        | 158.44        | 140.79                      | 122.18        | 162.23        | <b>220.92*</b>                                            | <b>194.67</b>  | <b>250.70</b>  |
|                                         | 1-Hydroxypyrene (Pyrene) (ng/mL)                                              | No                | 166.99                      | 148.35       | 187.96       | 130.17                         | 104.02        | 162.88        | 283.57                           | 269.81        | 298.04         | 199.91                            | 169.28        | 236.09        | 209.93                      | 178.80        | 246.47        | 305.18                                                    | 291.53         | 319.47         |
|                                         |                                                                               | Yes               | 140.51                      | 111.07       | 177.74       | <b>233.62*</b>                 | <b>156.22</b> | <b>349.36</b> | <b>335.14*</b>                   | <b>301.43</b> | <b>372.61</b>  | 226.50                            | 188.41        | 272.29        | 235.70                      | 193.66        | 286.87        | <b>436.52*</b>                                            | <b>379.90</b>  | <b>501.58</b>  |
|                                         | 2,3-Hydroxyphenanthrene (Phenanthrene) (ng/mL)                                | No                | 176.44                      | 156.05       | 199.49       | 124.14                         | 89.66         | 171.86        | 284.89                           | 273.17        | 297.11         | 205.96                            | 169.46        | 250.30        | 199.57                      | 175.11        | 227.43        | 277.36                                                    | 262.84         | 292.68         |
|                                         |                                                                               | Yes               | 134.72                      | 88.89        | 204.18       | 185.11                         | 120.06        | 285.39        | <b>320.74*</b>                   | <b>291.14</b> | <b>353.34</b>  | 212.42                            | 168.73        | 267.40        | 200.75                      | 169.81        | 237.32        | <b>340.45*</b>                                            | <b>297.12</b>  | <b>390.09</b>  |
| Volatile organic compounds (VOCs)       | N-Acetyl-S-(2-cyanoethyl)-L-cysteine (CYMA) (Acrylonitrile) (ng/mL)           | No                | 2.59                        | 1.97         | 3.41         | 2.29                           | 1.50          | 3.48          | 99.75                            | 95.75         | 103.92         | 21.65                             | 16.35         | 28.65         | 4.37                        | 3.22          | 5.93          | 127.19                                                    | 121.04         | 133.65         |
|                                         |                                                                               | Yes               | <b>8.68*</b>                | <b>4.04</b>  | <b>18.62</b> | <b>12.91*</b>                  | <b>5.83</b>   | <b>28.61</b>  | <b>138.98*</b>                   | <b>128.46</b> | <b>150.36</b>  | <b>59.14*</b>                     | <b>41.51</b>  | <b>86.34</b>  | <b>17.10*</b>               | <b>11.18</b>  | <b>26.14</b>  | <b>177.46*</b>                                            | <b>154.88</b>  | <b>203.31</b>  |
|                                         | N-Acetyl-S-(benzyl)-L-cysteine (BMA) (Toluene) (ng/mL)                        | No                | 7.46                        | 6.24         | 8.91         | 6.46                           | 4.56          | 9.14          | 6.49                             | 6.05          | 6.97           | 7.57                              | 6.10          | 9.40          | 8.56                        | 7.18          | 10.19         | 6.67                                                      | 6.10           | 7.29           |
|                                         |                                                                               | Yes               | 5.95                        | 4.38         | 8.07         | 6.55                           | 4.32          | 9.91          | 7.14                             | 6.52          | 7.81           | 9.03                              | 6.96          | 11.73         | 8.40                        | 6.80          | 10.38         | 7.52                                                      | 6.17           | 9.17           |
|                                         | N-Acetyl-S-(phenyl)-L-cysteine (PMA) (Benzene) (ng/mL)                        | No                | 1.12                        | 0.94         | 1.33         | 1.29                           | 0.89          | 1.87          | 1.06                             | 1.00          | 1.11           | 1.16                              | 0.94          | 1.43          | 1.10                        | 0.94          | 1.29          | 0.98                                                      | 0.92           | 1.04           |
|                                         |                                                                               | Yes               | 0.95                        | 0.69         | 1.31         | 1.28                           | 0.86          | 1.90          | 1.11                             | 0.99          | 1.25           | 0.83                              | 0.65          | 1.05          | 1.09                        | 0.88          | 1.35          | 1.00                                                      | 0.85           | 1.17           |
|                                         | N-Acetyl-S-(2-carboxyethyl)-L-cysteine (CEMA) (Acrolein) (ng/mL)              | No                | 123.11                      | 112.24       | 135.03       | 136.42                         | 99.32         | 187.38        | 249.95                           | 238.14        | 262.35         | 161.13                            | 131.84        | 196.91        | 125.88                      | 110.23        | 143.75        | 279.20                                                    | 263.83         | 295.45         |
|                                         |                                                                               | Yes               | 116.62                      | 84.64        | 160.69       | 130.91                         | 95.36         | 179.72        | 249.93                           | 229.31        | 272.39         | 137.18                            | 114.89        | 163.80        | 110.32                      | 92.84         | 130.64        | 283.02                                                    | 248.12         | 322.83         |
|                                         | N-Acetyl-S-(2-carbamoylethyl)-L-cysteine (AAMA) (Acrylamide) (ng/mL)          | No                | 63.91                       | 52.92        | 77.17        | 59.12                          | 46.36         | 75.41         | 125.36                           | 118.94        | 132.12         | 86.67                             | 71.90         | 104.46        | 78.10                       | 66.85         | 91.25         | 123.75                                                    | 118.34         | 129.40         |
|                                         |                                                                               | Yes               | 73.06                       | 51.03        | 104.58       | <b>110.63*</b>                 | <b>75.21</b>  | <b>162.72</b> | <b>174.59*</b>                   | <b>162.94</b> | <b>187.07</b>  | <b>131.40*</b>                    | <b>112.67</b> | <b>153.23</b> | <b>114.10*</b>              | <b>94.66</b>  | <b>137.52</b> | <b>195.78*</b>                                            | <b>168.07</b>  | <b>228.06</b>  |
|                                         | N-Acetyl-S-(4-hydroxy-2-buten-1-yl)-L-cysteine (MHB3) (1,3 Butadiene) (ng/mL) | No                | 5.60                        | 4.81         | 6.52         | 4.34                           | 3.24          | 5.80          | 24.98                            | 23.00         | 26.00          | 9.06                              | 7.46          | 10.98         | 5.14                        | 4.47          | 5.92          | 29.09                                                     | 27.69          | 30.57          |
|                                         |                                                                               | Yes               | 4.86                        | 3.60         | 6.55         | 4.73                           | 3.11          | 7.19          | 24.98                            | 22.00         | 26.11          | 7.65                              | 6.11          | 9.58          | 5.49                        | 4.79          | 6.29          | 29.27                                                     | 25.20          | 34.00          |

Total Nicotine Equivalents (TNE-2) = molar sum of imputed values of cotinine and trans-3'-hydroxycotinine. All geometric means are adjusted for urinary creatinine, age, sex, race, education, secondhand smoke exposure, and cannabis use. Geometric mean values for tobacco use groups were also adjusted for frequency and time since last product use. Toxicant biomarker analyses adjusted for dual use of tobacco and cannabis. Bold values indicate statistically significant differences between non-cannabis users and past 30 day cannabis users (p<0.05).

"Non-tobacco users" = never users of tobacco or former cigarette smokers who reported quitting six months prior to their interview with urinary NNAL levels under 14.5 pg/mg creatinine. (Goniewicz and Smith, 2018)

All tobacco user groups were defined as current everyday or some day users of their tobacco product, with no current or some days use of any other tobacco product (tobacco product list: cigarettes, e-cigarettes, traditional cigars, cigarillos, filtered cigars, pipe tobacco, hookah, smokeless tobacco, snus, dissolvable tobacco.)

All groups included exclusions for past three-day use of nicotine replacement therapies (NRT).

E-cigarette user group excluded those with urinary NNAL levels exceeding 14.5 pg/mg creatinine (Goniewicz and Smith, 2018)

Cigarette users and dual users were included if they reported smoking at least 100 cigarettes during their lifetime.

All estimates are weighted using urine weights for the PATH biospecimen subsample
